# Supplementary material for: Poxvirus Host Range Genes and Virus–Host Spectrum: A Critical Review
Source: MDPI journal article supplement (doi:10.3390/v9110331), 2017-11-07
Supplement: s1 [file s1]

---

**Chordopoxvirinae**

---

| <b>Name</b>                                    | <b>Abbreviation</b> | <b>Genus</b>                    |
|------------------------------------------------|---------------------|---------------------------------|
| <i>Fowlpox virus</i>                           | FWPV                | <i>Avipoxvirus</i>              |
| <i>Psittacinepox virus</i>                     | PTCV                | <i>Avipoxvirus</i>              |
| <i>Mynahpox virus</i>                          | MNPV                | <i>Avipoxvirus</i>              |
| <i>Sparrowpox virus</i>                        | SPWV                | <i>Avipoxvirus</i>              |
| <i>Starlingpox virus</i>                       | SLPV                | <i>Avipoxvirus</i>              |
| <i>Canarypox virus</i>                         | CNPV                | <i>Avipoxvirus</i>              |
| <i>Juncopox virus</i>                          | JCPV                | <i>Avipoxvirus</i>              |
| <i>Quailpox virus</i>                          | QLPV                | <i>Avipoxvirus</i>              |
| <i>Pigeonpox virus</i>                         | PGPV                | <i>Avipoxvirus</i>              |
| <i>Turkeypox virus</i>                         | TKPV                | <i>Avipoxvirus</i>              |
| Shearwater poxvirus                            | ShWPV               | <i>Avipoxvirus</i> (putative)   |
| Penguin poxvirus                               | PNGV                | <i>Avipoxvirus</i> (putative)   |
| <i>Goatpox virus</i>                           | GTPV                | <i>Capripoxvirus</i>            |
| <i>Lumpy skin disease virus</i>                | LSDV                | <i>Capripoxvirus</i>            |
| <i>Sheeppox virus</i>                          | SPPV                | <i>Capripoxvirus</i>            |
| <i>Yokapox virus</i>                           | YOKV                | <i>Centapoxvirus</i>            |
| NY_014 poxvirus                                | NY_014              | <i>Centapoxvirus</i> (putative) |
| Murmansk poxvirus                              | MMPV                | <i>Centapoxvirus</i> (putative) |
| <i>Mule deerpox virus</i>                      | MDPV                | <i>Cervidpoxvirus</i>           |
| <i>Nile crocodilepox virus</i>                 | NCPV                | <i>Crocodylidpoxvirus</i>       |
| <i>Myxoma virus</i>                            | MYXV                | <i>Leporipoxvirus</i>           |
| <i>Rabbit fibroma virus</i>                    | RFV                 | <i>Leporipoxvirus</i>           |
| <i>Squirrel fibroma virus</i>                  | SFV                 | <i>Leporipoxvirus</i>           |
| <i>Hare fibroma virus</i>                      | HFV                 | <i>Leporipoxvirus</i>           |
| <i>Molluscum contagiosum virus</i>             | MOCV                | <i>Molluscipoxvirus</i>         |
| <i>Ectromelia virus</i>                        | ECTV                | <i>Orthopoxvirus</i>            |
| <i>Skunkpox virus</i>                          | SKPV                | <i>Orthopoxvirus</i>            |
| <i>Camelpox virus</i>                          | CMLV                | <i>Orthopoxvirus</i>            |
| <i>Cowpox virus</i>                            | CPXV                | <i>Orthopoxvirus</i>            |
| <i>Raccoonpox virus</i>                        | RPXV                | <i>Orthopoxvirus</i>            |
| <i>Taterapox virus</i>                         | TATV                | <i>Orthopoxvirus</i>            |
| <i>Vaccinia virus</i>                          | VACV                | <i>Orthopoxvirus</i>            |
| <i>Variola virus</i>                           | VARV                | <i>Orthopoxvirus</i>            |
| <i>Volepox virus</i>                           | VOLV                | <i>Orthopoxvirus</i>            |
| <i>Orf virus</i>                               | ORFV                | <i>Parapoxvirus</i>             |
| <i>Parapoxvirus of red deer in New Zealand</i> | PRDV                | <i>Parapoxvirus</i>             |
| <i>Pseudocowpox virus</i>                      | PCPV                | <i>Parapoxvirus</i>             |
| <i>Bovine papular stomatitis virus</i>         | BPSV                | <i>Parapoxvirus</i>             |
| <i>Swinepox virus</i>                          | SWPV                | <i>Suipoxvirus</i>              |
| <i>Squirrelepox virus</i>                      | SQPV                | Unassigned                      |
| <i>Pteropox virus</i>                          | PTPV                | Unassigned                      |
| <i>Cotia virus</i>                             | COTV                | Unassigned                      |
| BeAn58058                                      | BeAn                | Unassigned                      |
| <i>Eptesipox virus</i>                         | ETPV                | Unassigned                      |
| Salmon Gill Poxvirus                           | SGPV                | Unassigned                      |
| <i>Tanapox virus</i>                           | TPV                 | <i>Yatapoxvirus</i>             |
| <i>Yaba monkey tumor virus</i>                 | YMTV                | <i>Yatapoxvirus</i>             |
| <i>Yaba-like disease virus</i>                 | YLDV                | <i>Yatapoxvirus</i> (putative)  |

---

---

**Entomopoxvirinae**

---

| <b>Name</b>                                         | <b>Abbreviation</b> | <b>Genus</b>               |
|-----------------------------------------------------|---------------------|----------------------------|
| <i>Aphodius tasmaniae entomopoxvirus</i>            | ATEV                | <i>Alphaentomopoxvirus</i> |
| <i>Geotrupes sylvaticus entomopoxvirus</i>          | GSEV                | <i>Alphaentomopoxvirus</i> |
| <i>Anomala cuprea entomopoxvirus</i>                | ACuEV               | <i>Alphaentomopoxvirus</i> |
| <i>Melolontha melolontha entomopoxvirus</i>         | MMEV                | <i>Alphaentomopoxvirus</i> |
| <i>Demodema bonariensis entomopoxvirus</i>          | DBEV                | <i>Alphaentomopoxvirus</i> |
| <i>Dermolepida albohirtum entomopoxvirus</i>        | DAEV                | <i>Alphaentomopoxvirus</i> |
| <i>Figulus sublaevis entomopoxvirus</i>             | FSEV                | <i>Alphaentomopoxvirus</i> |
| <i>Choristoneura fumiferana entomopoxvirus</i>      | CFEV                | <i>Betaentomopoxvirus</i>  |
| <i>Mythimna separata entomopoxvirus</i>             | MySEV               | <i>Betaentomopoxvirus</i>  |
| <i>Locusta migratoria entomopoxvirus</i>            | LMEV                | <i>Betaentomopoxvirus</i>  |
| <i>Arphia conspersa entomopoxvirus</i>              | ACEV                | <i>Betaentomopoxvirus</i>  |
| <i>Choristoneura diversuma entomopoxvirus</i>       | CDEV                | <i>Betaentomopoxvirus</i>  |
| <i>Chorizagrotis auxiliaris entomopoxvirus</i>      | CAuEV               | <i>Betaentomopoxvirus</i>  |
| <i>Choristoneura rosaceana entomopoxvirus</i>       | CREV                | <i>Betaentomopoxvirus</i>  |
| <i>Heliothis armigera entomopoxvirus</i>            | HAEV                | <i>Betaentomopoxvirus</i>  |
| <i>Oedaleus senegalensis entomopoxvirus</i>         | OSEV                | <i>Betaentomopoxvirus</i>  |
| <i>Adoxophyes honmai entomopoxvirus</i>             | AHEV                | <i>Betaentomopoxvirus</i>  |
| <i>Amsacta moorei entomopoxvirus</i>                | AMEV                | <i>Betaentomopoxvirus</i>  |
| <i>Choristoneura biennis entomopoxvirus</i>         | CBEV                | <i>Betaentomopoxvirus</i>  |
| <i>Choristoneura conflicta entomopoxvirus</i>       | CCEV                | <i>Betaentomopoxvirus</i>  |
| <i>Acrobasis zelleri entomopoxvirus</i>             | AZEV                | <i>Betaentomopoxvirus</i>  |
| <i>Operophtera brumata entomopoxvirus</i>           | OBEV                | <i>Betaentomopoxvirus</i>  |
| <i>Schistocerca gregaria entomopoxvirus</i>         | SGEV                | <i>Betaentomopoxvirus</i>  |
| <i>Aedes aegypti entomopoxvirus</i>                 | AEV                 | <i>Gammaentomopoxvirus</i> |
| <i>Chironomus attenuatus entomopoxvirus</i>         | CAtEV               | <i>Gammaentomopoxvirus</i> |
| <i>Goeldichironomus holoprasinus entomopoxvirus</i> | GHEV                | <i>Gammaentomopoxvirus</i> |
| <i>Chironomus luridus entomopoxvirus</i>            | CLEV                | <i>Gammaentomopoxvirus</i> |
| <i>Camptochironomus tentans entomopoxvirus</i>      | CTEV                | <i>Gammaentomopoxvirus</i> |
| <i>Chironomus plumosus entomopoxvirus</i>           | CPEV                | <i>Gammaentomopoxvirus</i> |
| <i>Diachasmimorpha entomopoxvirus</i>               | DMEV                | Unassigned                 |
| <i>Melanoplus sanguinipes entomopoxvirus</i> 'O'    | MSEV                | Unassigned                 |

---
