# Supplementary material for: Poxvirus Host Range Genes and Virus–Host Spectrum: A Critical Review
Source: MDPI journal article supplement (doi:10.3390/v9110331), 2017-11-07
Supplement: s1 [file s1]

| Gene Group     | Host Range Gene | Protein Reference Sequence                    |
|----------------|-----------------|-----------------------------------------------|
| K3L            | K3L             | VACV-WR [034] (AAO89313.1)                    |
| E3L            | E3L             | VACV-WR [059] (AAO89338.1)                    |
| Serpins        | SPI-1           | VACV-WR [205] (AAO89484.1)                    |
|                | SPI-2           | VACV-WR [195] (AAO89474.1)                    |
|                | SPI-3           | VACV-WR [033] (AAO89312.1)                    |
| p28-like       | p28-like        | RFV Rabbit fibroma virus[s143R] (NP_052029.1) |
|                | p28-like        | CPXV [023] (NP_619812.1 )                     |
|                | p28-like        | CNPV [103] (NP_955126.1 )                     |
|                | p28-like        | SGPV (YP_009162511.1)                         |
|                | p28-like        | APMV (AKI80654.1)                             |
| C7 family      | C7L             | VACV-WR [021] (AAO89300.1)                    |
|                | C4L             | CPXV-GRI90 [C4L] (CAD90593.1)                 |
|                | M062R           | MYXV-FLIH [m062R] (AMB18231.1)                |
|                | M063R           | MYXV-FLIH [m062R] (AMB18232.1)                |
|                | M064R           | MYXV-FLIH [m062R] (AMB18233.1)                |
| T4             | T4              | MYXV-FLIH [m004R] (AMB18330.1)                |
| B5R-related    | B5R             | VACV-WR [187] (AAO89466.1)                    |
|                | VCP             | VACV-WR [025] (AAO89304.1)                    |
|                | C3L             | MYXV-FLIH [m144R] (AMB18313.1)                |
| M13L           | M13L            | MYXV-FLIH [m013L] (AMB18183.1)                |
| M11L/F1L       | M11L            | VACV-WR [040] (AAO89319.1)                    |
|                | F1L             | MYXV-FLIH [m011L] (AMB18181.1)                |
| K1L            | K1L             | VACV-WR [032] (AAO89311.1)                    |
| TNFR II family | T2              | MYXV-MAV [m002R] (AMB18488.1)                 |
|                | CrmB            | CPXV-Brighton Red [005] (AAA60952.1)          |
|                | CrmC            | CPXV-Brighton Red [191] (AAM13631.1)          |
|                | CrmD            | CPXV-Brighton Red [221] (AAM13659.1)          |
|                | CrmE            | CPXV-EV(CAC15562.1)                           |
| ANK/F-box      | Ank 1           | CPXV-Brighton Red [213] (AAM13652.1)          |
|                | Ank 2           | CPXV-Brighton Red [011] (AAM13458.1)          |
|                | Ank 3           | CPXV-Brighton Red [211] (AAM13650.1)          |
|                | Ank 4           | CPXV-Brighton Red [220] (AAM13658.1)          |
|                | Ank 5           | CPXV-Brighton Red [225] (AAM13662.1)          |
|                | Ank 6           | CPXV-Brighton Red [198] (AAM13637.1)          |
|                | Ank 7           | CPXV-Brighton Red [025] (AAM13472.1)          |
|                | Ank 8           | CPXV-Brighton Red [017] (AAM13464.1)          |
|                | Ank 9           | CPXV-Brighton Red [027] (AAM13474.1)          |
|                | Ank 10          | CPXV-Brighton Red [223] (AAM13661.1)          |
|                | Ank 11          | DPV-W-848-83 [165] (YP_227540.1)              |

|        |                                  |
|--------|----------------------------------|
| Ank 12 | DPV-W-848-83 [161] (YP_227536.1) |
| Ank 13 | DPV-W-848-83 [164] (YP_227539.1) |
| Ank 14 | DPV-W-848-83 [166] (YP_227541.1) |

---
